# Supplementary material for: Targeting intestinal microecology: potential intervention strategies of traditional Chinese medicine for managing hypertension
Source: Front Pharmacol. 2023 May 31;14:1171119. doi: 10.3389/fphar.2023.1171119 (PMC10264781; doi:10.3389/fphar.2023.1171119)
Supplement: Supplementary file 1 [file Table1.xlsx]

## Sheet: Sheet2
Table 1 The clinical evidence of TCM for hypertension
No.	Name of traditional Chinese medicine	Compositions	Intervention group vs. control group	Method	Sample size (T/C)	Duration of treatment	Clinical symptoms	Laboratory finding	References
1	Songling Xuemaikang capsule(SXC)	Pueraria montana var. lobata (Willd.) Maesen & S.M.Almeida ex Sanjappa & Predeep [Fabaceae; puerariae lobatae radix], Aralia chinensis L. [Araliaceae], Pearl [Margaritiferidae; margarita]	SXC vs. losartan	RCT	628 (314/314)	8 weeks	•SXC was well tolerated and demonstrated noninferior to losartan in BP lowering in patients with mild hypertension •Improve total hypertension symptom score	•Reduce serum TC level	Lai et al. (2022)
2	Gastrodia-Uncaria granules（GUG）	Gastrodia elata Blume [Orchidaceae; gastrodiae rhizoma], Uncaria hirsuta Havil. [Rubiaceae; uncariae ramulus cum uncis], Haliotis Linnaeus, 1758.[Haliotidae; Concha Haliotidis], Eucommia ulmoides Oliv. [Eucommiaceae; cortex eucommiae ulmoidis], Taxillus chinensis (DC.) Danser [Loranthaceae; taxilli herba], Achyranthes bidentata Blume. [Amaranthaceae; radix Achyranthis Bidentatae], Leonurus japoni…	GUG vs. placebo	RCT	251 (126/125)	4 weeks	•Reduce daytime BP and 24-hour BP	Unreported	Zhang et al. (2020)
3	Guipi decoction(GPD)	Astragalus mongholicus Bunge [Fabaceae; astragali radix praeparata cum mell], Salvia miltiorrhiza Bunge [Lamiaceae; salviae miltiorrhizae radix et rhizoma], Wolfiporia cocos (Schw.) Ryv. & Cilbn. [Polyporaceae; poria], Atractylodes macrocephala Koidz. [Asteraceae; atractylodis macrocephalae rhizoma], patholobus suberectus Dunn [Fabaceae; caulis spatholobi], Ziziphus jujuba Mill. [Rhamnaceae; juju…	GPD vs. WM	RCT	63 (32/31)	4 weeks	•Improve the total clinical efficiency •Reduce 24 h standard deviation of DBP and SBP, and the standard deviation of DSBP and NSBP •Improve TCM syndrome scores	Unreported	Qi.(2022)
4	Banxia Baizhu Tianma decoction(BBTD)	Pinellia ternata (Thunb.) Makino [Araceae; pinelliae rhizoma], Atractylodes macrocephala Koidz. [Asteraceae; atractylodis macrocephalae rhizoma], Gastrodia elata Blume [Orchidaceae; gastrodiae rhizoma], Citrus × aurantium f. deliciosa (Ten.) M.Hiroe [Rutaceae; citri exocarpium rubrum], Wolfiporia cocos (Schw.) Ryv. & Cilbn. [Polyporaceae; poria], Zingiber officinale Roscoe [Zingiberaceae; rhizoma…	BBTD+WM vs. WM	RCT	184 (92/92)	4 weeks	•Improve the total clinical efficiency •Reduce DBP and SBP •Improve TCM syndrome scores	•Decrease serum ET-1 level and increase serum NO level •Reduce the level of D-Dimer	Li and Wang.(2021)
					80 (40/40)	4 weeks	•Improve TCM syndrome scores •Reduce DBP and SBP •Improve the total clinical efficiency	•Reduce the level of whole blood viscosity	Zhang et al. (2021)
					108 (54/54)	1 month	•Reduce DBP and SBP •Improve TCM syndrome scores	•Reduce the levels of Aldosterone, Plasma Renin Activity, and Ang-II	Zheng.(2021)
5	Bushen Huoxue decoction(BHD)	Taxillus chinensis (DC.) Danser [Loranthaceae; taxilli herba], Salvia miltiorrhiza Bunge [Lamiaceae; salviae miltiorrhizae radix et rhizoma], Asparagus cochinchinensis (Lour.) Merr. [Asparagaceae; asparagi radix], Paeonia anomala subsp. veitchii (Lynch) D.Y.Hong & K.Y.Pan [Paeoniaceae; paeoniae radix rubra], Pheretima guillelmi (Michaelsen) [Megascolecidae; Lumbricus], Reynoutria multiflora (Thun…	BHD+WM vs. WM	RCT	100 (50/50)	30 days	•Improve the total clinical efficiency •Reduce DBP and SBP •Lower heart rate	•Decrease the levels of IL-6, hs-CRP, and TNF-α •Decrease serum β2-microglobulin level •Increase serum glomerular filtration rate	Ding et al. (2022)
6	Wendan decoction(WDD)	Glycyrrhiza glabra L. [Fabaceae; glycyrrhizae radix et rhizoma], Gastrodia elata Blume [Orchidaceae; gastrodiae rhizoma], Pinellia ternata (Thunb.) Makino [Araceae; pinelliae rhizoma], Citrus × aurantium f. deliciosa (Ten.) M.Hiroe [Rutaceae; citri exocarpium rubrum], Gardenia jasminoides J.Ellis [Rubiaceae; gardeniae fructus], Bambusa tuldoides Munro [Poaceae; bambusae caulis in taenia], Prunell…	WDD+WM vs. WM	RCT	100 (50/50)	3 months	•Improve the total clinical efficiency •Reduce DBP and SBP •Improve TCM syndrome scores	•Decrease serum ET-1 and MMP9 levels and increase serum NO level	Yang et al. (2022a)
7	Jianling decoction(JLD)	Dioscorea oppositifolia L. [Dioscoreaceae; dioscoreae rhizoma], Pisaster ochraceus (Brandt, 1835) [Asteriidae; ochra], Achyranthes bidentata Blume. [Amaranthaceae; radix Achyranthis Bidentatae], Eucommia ulmoides Oliv. [Eucommiaceae; cortex eucommiae ulmoidis], Fossilia Ossis Mastodi (Baill.) [Fabaceae; Os Draconis], Crassostrea gigas (Thunberg) [Ostreidae; Ostreae Testa], Rehmannia glutinosa (Ga…	JLD+WM vs. WM	RCT	72 (36/36)	28 days	•Improve the total clinical efficiency •Reduce DBP and SBP •Improve TCM syndrome scores	Unreported	Wang et al. (2022b)
8	Zhengan Xifeng decoction(ZFD)	Pisaster ochraceus (Brandt, 1835) [Asteriidae; ochra], Achyranthes bidentata Blume. [Amaranthaceae; radix Achyranthis Bidentatae], Fossilia Ossis Mastodi (Baill.) [Fabaceae; Os Draconis], Crassostrea gigas (Thunberg) [Ostreidae; Ostreae Testa], Chinemys reevesii (Gray) [Geoemydidae; Testudinis Carapax et Plastrum], Scrophularia ningpoensis Hemsl. [Scrophulariaceae; radix scrophulariae], Paeonia l…	ZFD vs. WM	RCT	120 (60/60)	4 weeks	•Improve the total clinical efficiency •Reduce 24 h SBP, 24 h DBP, and 24 h SBP and DBP variability •Improve TCM syndrome scores	Unreported	Liu.(2022)
9	Xiaochaihu decoction(XCHD)	Bupleurum chinense DC. [Apiaceae; bupleuri radix], Scutellaria baicalensis Georgi [Lamiaceae; extractum scutellariae], Pinellia ternata (Thunb.) Makino [Araceae; pinelliae rhizoma], Pseudostellaria heterophylla (Miq.) Pax [Caryophyllaceae; pseudostellariae radix], Glycyrrhiza glabra L. [Fabaceae; glycyrrhizae radix et rhizoma], Uncaria hirsuta Havil. [Rubiaceae; uncariae ramulus cum uncis], Achyr…	XCHD+WM vs. WM	RCT	261 (158/103)	2 weeks	•Improve TCM syndrome scores •Improve the total clinical efficiency	Unreported	Wu and Zhong.(2022)
10	Tianma Gouteng decoction(TGD)	Gastrodia elata Blume [Orchidaceae; gastrodiae rhizoma],Uncaria hirsuta Havil. [Rubiaceae; uncariae ramulus cum uncis], Haliotis Linnaeus, 1758.[Haliotidae; Concha Haliotidis], Gardenia jasminoides J.Ellis [Rubiaceae; gardeniae fructus], Scutellaria baicalensis Georgi [Lamiaceae; extractum scutellariae], Achyranthes bidentata Blume. [Amaranthaceae; radix Achyranthis Bidentatae], Eucommia ulmoides…	TGD+WM vs. WM	RCT	60 (30/30)	1 month	•Improve the total clinical efficiency •Reduce 24 h standard deviation of DBP and SBP, and the standard deviation of DSBP and NSBP •Alleviate clinical symptoms such as headache, dizziness and palpitation •Improve TCM syndrome scores	Unreported	Yan et al. (2022)
13	Chaihu Longgu Muli decoction(CLMD)	Bupleurum chinense DC. [Apiaceae; bupleuri radix], Panax ginseng C.A.Mey. [Araliaceae; folium ginseng], Fossilia Ossis Mastodi (Baill.) [Fabaceae; Os Draconis], Pinellia ternata (Thunb.) Makino [Araceae; pinelliae rhizoma], Rheum officinale Baill. [Polygonaceae; extractum rhei liquidum], Crassostrea gigas (Thunberg) [Ostreidae; Ostreae Testa], Neolitsea cassia (L.) Kosterm. [Lauraceae; cinnamomi …	CLMD+WM vs. WM	RCT	80 (40/40)	8 weeks	•Reduce DBP and SBP •Improve TCM syndrome scores	Unreported	Xia.(2022)
14	Tianma Gouteng decoction(TGD)	Gastrodia elata Blume [Orchidaceae; gastrodiae rhizoma], Uncaria hirsuta Havil. [Rubiaceae; uncariae ramulus cum uncis], Haliotis Linnaeus, 1758.[Haliotidae; Concha Haliotidis], Gardenia jasminoides J.Ellis [Rubiaceae; gardeniae fructus], Scutellaria baicalensis Georgi [Lamiaceae; extractum scutellariae], Achyranthes bidentata Blume. [Amaranthaceae; radix Achyranthis Bidentatae], Eucommia ulmoide…	TGD+WM vs. WM	RCT	60 (30/30)	2 weeks	•Reduce DBP and SBP •Improve TCM syndrome scores such as Dizziness, headache, irritability	•Decrease serum Ang-II and aldosterone levels	Liu et al.(2021)
15	Wendan decoction(WDD)	Glycyrrhiza glabra L. [Fabaceae; glycyrrhizae radix et rhizoma], Gastrodia elata Blume [Orchidaceae; gastrodiae rhizoma], Pinellia ternata (Thunb.) Makino [Araceae; pinelliae rhizoma], Citrus × aurantium f. deliciosa (Ten.) M.Hiroe [Rutaceae; citri exocarpium rubrum], Citrus × aurantium L. [Rutaceae; aurantii fructus],Bambusa tuldoides Munro [Poaceae; bambusae caulis in taenia], Prunella vulgaris…	WDD+WM vs. WM	RCT	60 (30/30)	4 weeks	•Reduce TCM syndrome scores such as Dizziness, headache, irritability	Unreported	Yang et al. (2022b)
16	Fufang Danshen(FFDS)	Salvia miltiorrhiza Bunge [Lamiaceae; salviae miltiorrhizae radix et rhizoma], Rhodiola crenulata (Hook.f. & Thomson) H.Ohba [Crassulaceae; rhodiolae crenulatae radix et rhizoma], Chrysanthemum × morifolium (Ramat.) Hemsl. [Asteraceae; chrysanthemi flos], Pueraria montana var. lobata (Willd.) Maesen & S.M.Almeida ex Sanjappa & Predeep [Fabaceae; puerariae lobatae radix]	FFDS vs. placebo	RCT	55 (30/25)	12 weeks	•Reduce SBP and pulse rate •Improve control rate of BP	Unreported	Yang et al. (2012)
17	Annao tablets(ANT)	Calculus bovis. [Bovidae], Salvia miltiorrhiza Bunge[Lamiaceae; Salvianolic acid C ], Ardisia crenata Sims [Primulaceae; ardisiae crenatae radix], Blumea balsamifera and Kaempferia galanga[Asteraceae; Borneol], Achyranthes bidentata Blume. [Amaranthaceae; radix Achyranthis Bidentatae], Pearl [Margaritiferidae; margarita], Coptis chinensis Franch. [Ranunculaceae; coptidis rhizoma], Gardenia jasmin…	ANT+WM vs. WM	RCT	68 (35/33)	8 weeks	•Improve the total clinical efficiency •Reduce DBP and SBP •Improve the total clinical efficiency	Unreported	Chen et al. (2022)
18	Polygoni Cuspidati Folium capsule(PCFC)	Reynoutria japonica Houtt. [Polygonaceae; polygoni cuspidati rhizoma et radix]	PCFC+WM vs. WM	RCT	160 (80/80)	3 months	•Improve the total clinical efficiency •Decrease TCM syndrome points •Reduce DBP and SBP	•Decrease serum ET-1 level and increase serum NO level	Ding and Gao. (2021)
19	Qinggan Jiangya capsule(QJC)	Reynoutria multiflora (Thunb.) Moldenke [Polygonaceae; polygoni multiflori caulis], Prunella vulgaris L. [Lamiaceae; prunellae spica], Styphnolobium japonicum (L.) Schott [Fabaceae; flos sophorae], Taxillus chinensis (DC.) Danser [Loranthaceae; taxilli herba], Salvia miltiorrhiza Bunge [Lamiaceae; salviae miltiorrhizae radix et rhizoma], Pueraria montana var. lobata (Willd.) Maesen & S.M.Almeida …	QJC+WM vs. WM	RCT	120 (60/60)	4 weeks	•Reduce DBP and SBP •Improve the total clinical efficiency •Reduce TCM syndrome points	Unreported	Shi et al.(2022)
20	Songling Xuemaikang capsule(SXC)	Pueraria montana var. lobata (Willd.) Maesen & S.M.Almeida ex Sanjappa & Predeep [Fabaceae; puerariae lobatae radix], Aralia chinensis L. [Araliaceae], Pearl [Margaritiferidae; margarita]	SXC+WM vs. WM	RCT	150 (75/75)	3 months	•Improve the total clinical efficiency •Reduce DBP and SBP •Improve TCM syndrome scores	•Decrease serum homocysteine level	An.(2021)
21	Gastrodin Tablets(GT)	Gastrodia elata Blume [Orchidaceae; gastrodiae rhizoma]	GT+WM vs. WM	RCT	86 (43/43)	4 weeks	•Improve 24 h standard deviation of SBP, and the standard deviation of DSBP and NSBP •Improve the total clinical efficiency	•Decrease the level of Angiotensin Ⅱ	Deng.(2022)
22	Xinmaitong capsule(XNT)	Angelica sinensis (Oliv.) Diels [Apiaceae; angelicae sinensis radix], Salvia miltiorrhiza Bunge [Lamiaceae; salviae miltiorrhizae radix et rhizoma], Ilex pubescens Hook. et Arn [Aquifoliaceae; Herba Ilicis Pubescentis], Pueraria montana var. lobata (Willd.) Maesen & S.M.Almeida ex Sanjappa & Predeep [Fabaceae; puerariae lobatae radix], Achyranthes bidentata Blume. [Amaranthaceae; radix Achyranthi…	XNT+WM vs. WM	RCT	140 (70/70)	2 months	•Improve the total clinical efficiency •Reduce SBP and DBP •Decrease TCM syndrome points	•Decrease serum ET-1, lipid peroxide, and Lp-PLA2 levels and increase serum NO level	Wang et al.(2022a)
23	Yangxue Qingnao granules(YXQN)	Angelica sinensis (Oliv.) Diels [Apiaceae; angelicae sinensis radix], Conioselinum anthriscoides 'Chuanxiong' [Apiaceae; chuanxiong rhizoma], Paeonia lactiflora Pall. [Paeoniaceae; paeoniae radix alba], Rehmannia glutinosa (Gaertn.) DC. [Orobanchaceae; rehmanniae radix], Uncaria hirsuta Havil. [Rubiaceae; uncariae ramulus cum uncis], patholobus suberectus Dunn [Fabaceae; caulis spatholobi], Prune…	YXQN+WM vs. WM	RCT	82 (41/41)	3 months	•Improve the total clinical efficiency •Improve 24 h standard deviation of DBP and SBP, and the standard deviation of DSBP and NSBP	•Decrease serum ET-1 and homocysteine levels and increase serum NO level	Su et al.(2022)
24	Qiangli Dingxuan tablets(QLDX)	Gastrodia elata Blume [Orchidaceae; gastrodiae rhizoma], Eucommia ulmoides Oliv. [Eucommiaceae; cortex eucommiae ulmoidis], Chrysanthemum × morifolium (Ramat.) Hemsl. [Asteraceae; chrysanthemi flos], Eucommia ulmoides Oliv. [Eucommiaceae; cortex eucommiae ulmoidis]; Conioselinum anthriscoides 'Chuanxiong' [Apiaceae; chuanxiong rhizoma]	QLDX+WM vs. WM	RCT	200 (100/100)	4 weeks	•Reduce SBP and DBP •Improve the total clinical efficiency	Unreported	Yin and Yan (2021)
25	Getong Tongluo capsule(GTC)	total flavone of Radix PuerariaeRadix Puerari	GTC + Ginkgo biloba inkgo biloba(EGB)-matching placebo vs.GTC-matching placebo + EGB	RCT	357 (237/120)	12 weeks	•Improve control rate of BP •Improve the quality of life	Unreported	Zhao et al. (2021)
26	Quanduzhong capsule(QDZ)	Eucommia ulmoides Oliv. [Eucommiaceae; cortex eucommiae ulmoidis]	QZDC vs. placebo	RCT	54 (27/27)	12 weeks	•Reduce the office SBP and DBP •Increased the night family diastolic blood pressure and the area under the curve •Alleviate clinical symptoms	Unreported	Jiang et al. (2022)
27	Qingnao Jiangya tablets(QJT)	Astragalus mongholicus Bunge [Fabaceae; astragali radix praeparata cum mell], Prunella vulgaris L. [Lamiaceae; prunellae spica], Styphnolobium japonicum (L.) Schott [Fabaceae; flos sophorae], Magnetite (Lodestone) L. [Spinel; Magnetitum], Achyranthes bidentata Blume. [Amaranthaceae; radix Achyranthis Bidentatae], Angelica sinensis (Oliv.) Diels [Apiaceae; angelicae sinensis radix], Rehmannia glut…	QJT+WM vs. WM	RCT	54 (27/27)	8 weeks	Unreported	•Decrease serum ET-1 level and increase serum NO level •Reduce the levels of transforming growth factor-β1 and Von Willebrand factor •Decrease serum Ang-I and Ang-II levels	Zhao and Zhao.(2022)
28	Qinggan Jiangya capsule(QJC)	Reynoutria multiflora (Thunb.) Moldenke [Polygonaceae; polygoni multiflori caulis], Prunella vulgaris L. [Lamiaceae; prunellae spica], Styphnolobium japonicum (L.) Schott [Fabaceae; flos sophorae], Taxillus chinensis (DC.) Danser [Loranthaceae; taxilli herba], Salvia miltiorrhiza Bunge [Lamiaceae; salviae miltiorrhizae radix et rhizoma], Pueraria montana var. lobata (Willd.) Maesen & S.M.Almeida …	QJC+WM vs. WM	RCT	392 (392)	4 weeks	•Reduce sitting DBP and SBP •Alleviate clinical symptoms such as headache, dizziness and palpitation	•Decrease serum VEGF and homocysteine levels	Liang et al. (2021)
29	Shanhaidan granules(SHDG)	Panax notoginseng (Burkill) F.H.Chen [Araliaceae; notoginseng radix et rhizoma], Panax ginseng C.A.Mey. [Araliaceae; folium ginseng], Astragalus mongholicus Bunge [Fabaceae; astragali radix praeparata cum mell], Carthamus tinctorius L. [Asteraceae; carthami flos], Senna obtusifolia (L.) H.S.Irwin & Barneby [Fabaceae; cassiae semen], Pueraria montana var. lobata (Willd.) Maesen & S.M.Almeida ex Sa…	SHDG+WM vs. WM	RCT	60 (30/30)	12 weeks	•Reduce 24 h standard deviation of SBP •Improve TCM syndrome score	Unreported	Huang et al. (2022)
30	Xinkeshu tablets(XKST)	Crataegus monogyna Jacq. [Rosaceae; crataegi folium cum flore], Salvia miltiorrhiza Bunge [Lamiaceae; salviae miltiorrhizae radix et rhizoma], Pueraria montana var. lobata (Willd.) Maesen & S.M.Almeida ex Sanjappa & Predeep [Fabaceae; puerariae lobatae radix], Panax notoginseng (Burkill) F.H.Chen [Araliaceae; notoginseng radix et rhizoma], Dolomiaea costus (Falc.) Kasana & A.K.Pandey [Asteraceae;…	XKST+WM vs. WM	RCT	82 (41/41)	3 months	•Reduce SBP and DBP •Improve the quality of life	•Reduce serum TC, TG, and LDL-C levels •Decrease the levels of IL-6, hs-CRP, and TNF-α	Cui et al.(2022)
31	Angong Jiangya pills(AGJY)	Curcuma longa L. [Zingiberaceae; curcumae longae rhizoma], Coptis chinensis Franch. [Ranunculaceae; coptidis rhizoma], Gardenia jasminoides J.Ellis [Rubiaceae; gardeniae fructus], Scutellaria baicalensis Georgi [Lamiaceae; extractum scutellariae], Gastrodia elata Blume [Orchidaceae; gastrodiae rhizoma], Conchiolinum [Conchiolinidae; margarita],Astragalus mongholicus Bunge [Fabaceae; astragali rad…	AGJY+WM vs. WM	RCT	120 (60/60)	1 month	•Improve 24 h standard deviation of DBP and SBP •Alleviate clinical symptoms such as headache, dizziness and palpitation •Improve the total clinical efficiency	Unreported	(Li and Wang.(2019)
32	Puerarin injection(PI)	Neustanthus phaseoloides (Roxb.) Benth. [Fabaceae; Puerarin]	PI+WM vs. WM	RCT	60 (30/30)	8 weeks	•Reduce SBP and DBP •Improve the total clinical efficiency •Relieve clinical symptoms such as headache, dizziness and palpitation	Unreported	Zhang and Wang.(2022)
33	Mai-Luo-Ning injection(MLNI)	Achyranthes bidentata Blume. [Amaranthaceae; radix Achyranthis Bidentatae], Scrophularia ningpoensis Hemsl. [Scrophulariaceae; radix scrophulariae], Dendrobium nobile Lindl. [Orchidaceae; dendrobii caulis], Lonicera japonica Thunb. [Caprifoliaceae; lonicerae japonicae flos]	MLNI+WM vs. WM	RCT	84 (42/42)	1 week	•Improve the total clinical efficiency •Reduce SBP and DBP	•Decrease the levels of IL-18 and Hcy •Reduce the level of D-Dimer	Yao et al. (2021)
34	Sofren injection(SI)	Rhodiola crenulata (Hook.f. & Thomson) H.Ohba [Crassulaceae; rhodiolae crenulatae radix et rhizoma]	SI+WM vs. WM	RCT	80 (40/40)	2 weeks	•Reduce SBP and DBP •Improve the total clinical efficiency	•Decrease serum ET-1 and thromboxane 2 levels and increase serum NO and 6-keto-PGF1α levels •Improve left ventricular ejection fraction •Increase 6-minute walk distance	(Song et al. (2020)
35	Sodium Tanshinone ⅡA Sulfonate injection(STSI)	Sodium Tanshinone ⅡA Sulfonate	STSI+WM vs. WM	RCT	100 (50/50)	2 weeks	•Improve the total clinical efficiency •Improve the quality of life	Unreported	Liang.(2020)
36	Danhong injection(DHI)	Salvia miltiorrhiza Bunge [Lamiaceae; salviae miltiorrhizae radix et rhizoma], Carthamus tinctorius L. [Asteraceae; carthami flos]	DHI+WM vs. WM	RCT	192 (96/96)	6 weeks	•Reduce SBP and DBP •Improve the total clinical efficiency	•Reduce serum TC, TG, and LDL-C levels and increase serum HDL-C level •Reduce serum ET-1 level and increase serum NO level •Decrease intima-media thickness of artery	Mai et al.(2020)
37	Danshen injection(DSI)	Salvia miltiorrhiza Bunge [Lamiaceae; salviae miltiorrhizae radix et rhizoma]	DSI+WM vs. WM	RCT	100 (50/50)	2 weeks	•Reduce DBP and SBP	•Reduce the levels of IL-6 and TNF-α	Zhang et al. (2022)
38	Gastrodin injection(DTI)	Gastrodin	DTI+WM vs. WM	RCT	112 (56/56)	2 months	•Reduce DBP and SBP	•Reduce the levels of Platelet-derived growth factor-BB and resistin	Xie.(2021)
39	Compound Danshen injection(CDSI)	Salvia miltiorrhiza Bunge [Lamiaceae; salviae miltiorrhizae radix et rhizoma], Dalbergia odorifera T.C.Chen [Fabaceae; dalbergiae odoriferae lignum]	CDSI+WM vs. WM	RCT	200 (100/100)	2 weeks	•Reduce SBP and DBP	•Reduce serum creatinine level and 24-hour urine protein •Decrease serum ET-1 level and increase serum NO level •Reduce the level of D-Dimer	(He and Zhang.(2021)
40	Huangqi injection(HQI)	Astragalus mongholicus Bunge [Fabaceae; astragali radix praeparata cum mell]	HQI+WM vs. WM	RCT	101 (50/51)	4 weeks	•Regulate 24 h standard deviation of DBP and SBP, and the standard deviation of DSBP and NSBP	•Reduce serum creatinine level and 24-hour urine protein	Lv.(2022)
TCM, traditional Chinese medicine; WM, Western medicine; BP, blood pressure; DBP, diastolic blood pressure; SBP, systolic blood pressure; NSBP, nighttime diastolic blood pressure; DSBP, daytime diastolic blood pressure; TG, triglyceride; TC, total cholesterol; LDL-C, low-density lipoprotein cholesterol; ET-1, endothelin-1; NO, nitric oxide; Ang II, angiotensin Ⅱ; IL-6, interleukin-6; TNF-α, tumor…
